# Supplementary figures and images for: ZBP1 enhances cell polarity and reduces chemotaxis
Source: Oxford University Press journal article supplement (doi:10.1242/jcs.000638), 2007-09-15

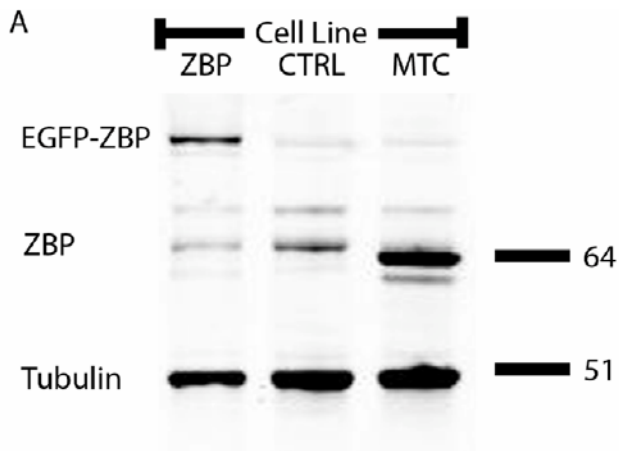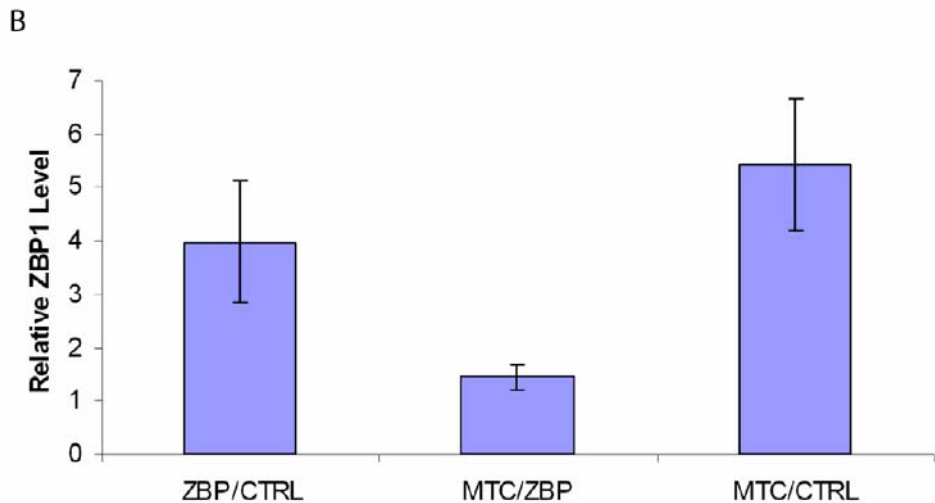

Supplement: jcs000638-figs1.pdf [file jcs000638-figs1.pdf]
